# Supplementary material
Source: PubMed Central journal article supplement (PMC4054169)

1 **Legends and References for Supplemental Material**

2

3 **Table S1.** Position of SNP differences between the published *C. perfringens* strain  
4 SM101 sequences ((1), <http://www.ncbi.nlm.nih.gov/bioproject/58117>) and that  
5 obtained in this report. The positions shown are relative to the published sequence  
6 (1).

7

8 **Table S2.** Cell dimensions and other parameters for strains used in this report.

9

10 **Figure S1.** Representative growth curves for each strain shown. Note that different  
11 inoculation methods were used for the SM101-SM124 based strains compared to  
12 the SM102-SM127 strains (see Materials and Methods).

13

14 **Figure S2.** Amount of PG in the strains indicated. The values shown are the mean  
15 and SEM of triplicates samples. *P* values were obtained using the student's double  
16 tailed t-test.

17

18 **Figure S3.** Representative images showing cells of strain SM101 **(A)** and SM102  
19 **(B)** after 18 h of growth on BHI medium with 0.1 µg/ml cephalixin. **(C).** Colony  
20 morphology of strain SM101 plated on BHI medium with 0.1 µg/ml cephalixin for  
21 40 h. **(D).** Colony morphology of strain SM102 plated on BHI medium with 0.1  
22 µg/ml cephalixin for 40 h.

23

24 **Video S1.** Time lapse video showing strain SM101 on BHI medium with 1% agar.

25 Elapsed time is shown in the upper left, scale bar in the lower left of the image.

26

27 **Video S2.** Time lapse video showing strain SM102 on BHI medium with 1% agar.

28 Elapsed time is shown in the upper left, scale bar in the lower left of the image.

29

30 **Video S3.** Time lapse video showing strain SM124 on BHI medium with 1% agar.

31 Elapsed time is shown in the upper left, scale bar in the lower left of the image.

32

33 **Video S4.** Time lapse video showing strain SM127 on BHI medium with 1% agar.

34 Elapsed time is shown in the upper left, scale bar in the lower left of the image.

35

36 **Video S5.** Time lapse video showing strain SM124(pHLL59) on BHI medium with

37 0.5 mM lactose and 1% agar. Elapsed time is shown in the upper left, scale bar in

38 the lower left of the image.

39

40 **Video S6.** Time lapse video showing strain SM127(pHLL60) on BHI medium with

41 0.5 mM lactose and 1% agar. Elapsed time is shown in the upper left, scale bar in

42 the lower left of the image.

43

44 1. **Myers, G. S., D. A. Rasko, J. K. Cheung, J. Ravel, R. Seshadri, R. T. Deboy, Q.**

45 **Ren, J. Varga, M. M. Awad, L. M. Brinkac, S. C. Daugherty, D. H. Haft, R. J.**

46 **Dodson, R. Madupu, W. C. Nelson, M. J. Rosovitz, S. A. Sullivan, H. Khouri,**

47 **G. I. Dimitrov, K. L. Watkins, S. Mulligan, J. Benton, D. Radune, D. J.**  
48 **Fisher, H. S. Atkins, T. Hiscox, B. H. Jost, S. J. Billington, J. G. Songer, B. A.**  
49 **Mcclane, R. W. Titball, J. I. Rood, S. B. Melville, and I. T. Paulsen. 2006.**  
50 Skewed genomic variability in strains of the toxigenic bacterial pathogen,  
51 *Clostridium perfringens*. Genome Res **16**:1031-1040.

52

53

| Position  | gene | locus_tag | Amino Acid Change | Nucleotide Change |
|-----------|------|-----------|-------------------|-------------------|
| 600,017   |      | CPR_0505  |                   | TTA -> CTT        |
| 1,059,547 |      | CPR_0924  |                   | (A)2 -> (A)3      |
| 1,155,221 |      | CPR_1013  | L -> F            | G -> T            |
| 1,155,223 |      | CPR_1013  | T -> I            | C -> T            |
| 1,334,542 |      | CPR_1183  |                   | (T)3 -> (T)4      |
| 1,491,313 |      | CPR_1320  | W -> C            | C -> G            |
| 1,491,562 |      | CPR_1320  |                   | G -> T            |
| 1,493,614 |      |           |                   | T -> C            |
| 1,494,727 |      | CPR_1323  | A -> V            | G -> A            |
| 1,502,023 |      | CPR_1332  | Q -> H            | T -> A            |
| 1,642,387 |      |           |                   | +A                |
| 1,815,617 |      | CPR_1624  |                   | +A                |
| 1,815,681 |      | CPR_1624  | YL -> FL          | GAT -> AGA        |
| 1,815,685 |      | CPR_1624  | I -> IL           | +ATA              |
| 1,818,982 |      |           |                   | G -> T            |
| 1,819,122 |      |           |                   | G -> A            |
| 1,819,140 |      |           |                   | (A)5 -> (A)6      |
| 1,819,252 |      |           |                   | C -> A            |
| 1,819,279 |      |           |                   | T -> G            |
| 1,828,829 |      |           |                   | (T)4 -> (T)3      |
| 1,877,193 | rpIS | CPR_1680  |                   | (T)4 -> (T)5      |
| 1,877,279 |      |           |                   | A -> G            |
| 2,402,474 | prfA | CPR_2176  |                   | G -> T            |
| 2,699,940 |      | CPR_2484  | F -> Y            | A -> T            |
| 2,699,950 |      | CPR_2484  | F -> L            | A -> G            |
| 2,700,211 |      |           |                   | G -> A            |
| 2,700,267 |      | CPR_2485  |                   | -G                |
| 2,700,378 |      | CPR_2485  | S -> L            | G -> A            |
| 2,798,075 |      |           |                   | +T                |
| 2,833,527 |      | CPR_2598  |                   | -A                |
| 2,862,319 |      |           |                   | (T)3 -> (T)2      |

**Table S2.**

| Strain        | Bacteria/OD <sub>600</sub><br>unit of 1.0 | Avg<br>length<br>( $\mu\text{m}$ ) <sup>1</sup> | Volume of<br>bacteria in<br>OD <sub>600</sub> unit<br>of 1.0<br>( $\mu\text{m}^3$ ) <sup>2</sup> | OD <sub>600</sub> of<br>colonies<br>scraped<br>off a plate <sup>3</sup> | Volume of<br>bacteria in<br>colonies scraped<br>off plates ( $\mu\text{m}^3$ ) |
|---------------|-------------------------------------------|-------------------------------------------------|--------------------------------------------------------------------------------------------------|-------------------------------------------------------------------------|--------------------------------------------------------------------------------|
| SM101         | $9.51 \times 10^8$                        | 3.59                                            | $3.24 \times 10^9$                                                                               | 0.652                                                                   | $2.11 \times 10^9$                                                             |
| SM124         | $5.46 \times 10^8$                        | 6.30                                            | $3.26 \times 10^9$                                                                               | 0.717                                                                   | $2.34 \times 10^9$                                                             |
| SM124(pHLL59) | $1.00 \times 10^9$                        | 3.90                                            | $3.71 \times 10^9$                                                                               | ND <sup>4</sup>                                                         | ND                                                                             |
| SM102         | $7.39 \times 10^8$                        | 3.61                                            | $2.53 \times 10^9$                                                                               | 0.527                                                                   | $1.33 \times 10^9$                                                             |
| SM127         | $1.40 \times 10^8$                        | 8.60                                            | $1.14 \times 10^9$                                                                               | 0.732                                                                   | $8.34 \times 10^8$                                                             |
| SM127(pHLL61) | $4.90 \times 10^8$                        | 3.97                                            | $1.85 \times 10^9$                                                                               | ND                                                                      | ND                                                                             |

1. Same data as in Fig. 2B.
2. Calculated using the formula for the volume of a cylinder ( $V=\pi r^2 l$ ) x bacteria/OD<sub>600</sub> unit of 1.0. For each strain listed, the radius = 0.55  $\mu\text{m}$ .
3. Mean values from 4 colonies placed on duplicate plates.
4. ND, not determined.

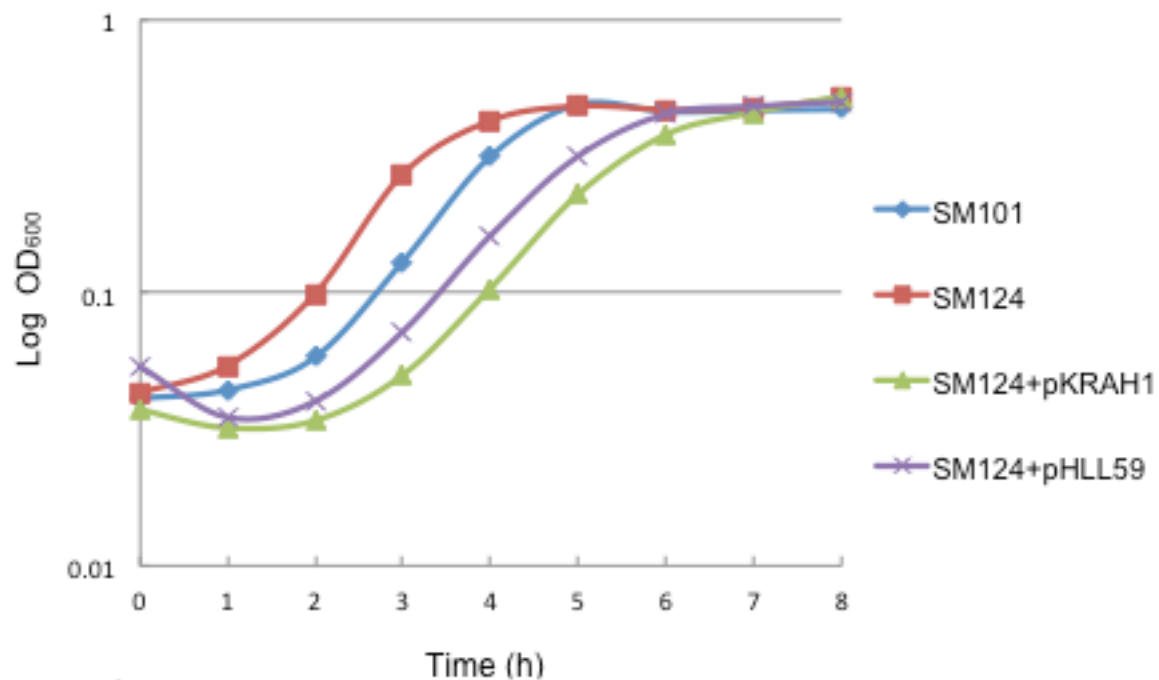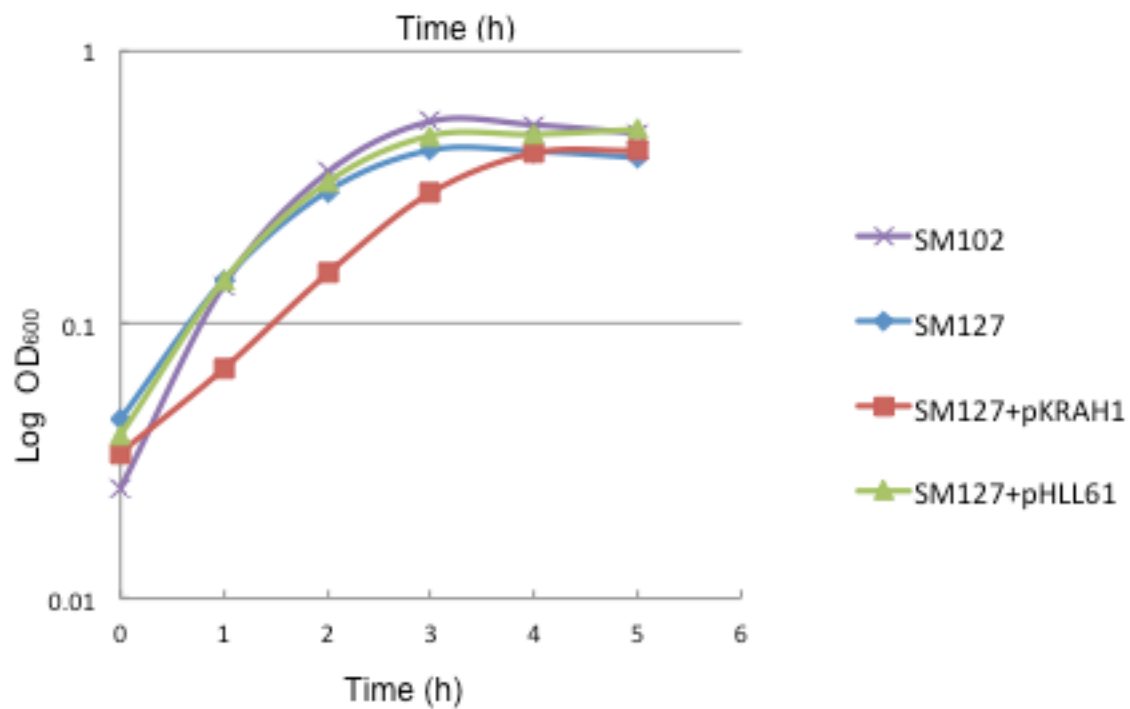

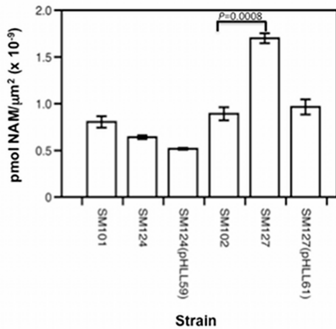

**A.**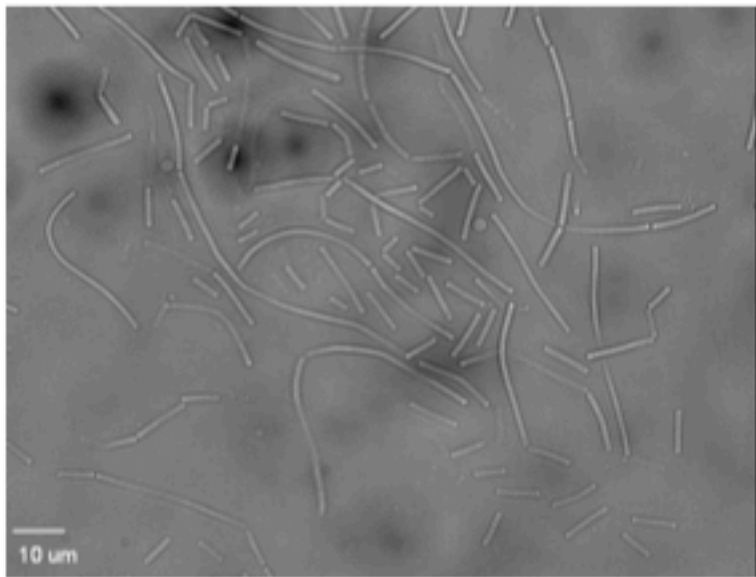**B.**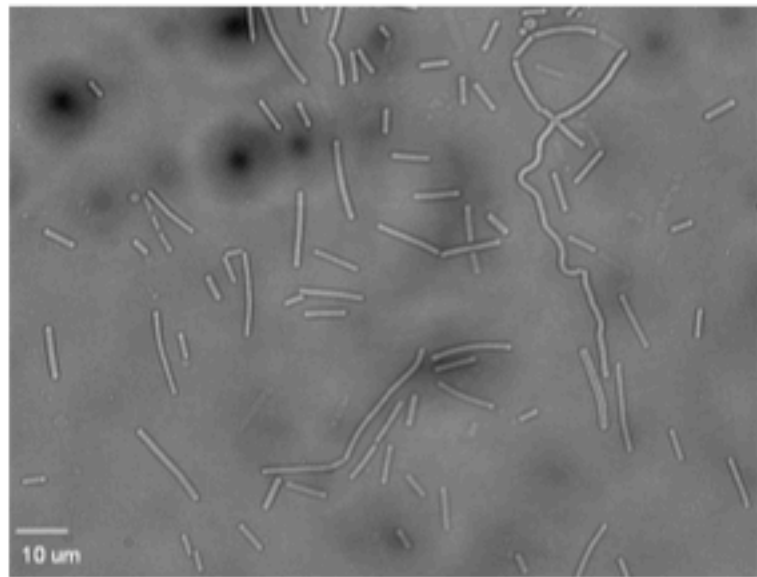**C.**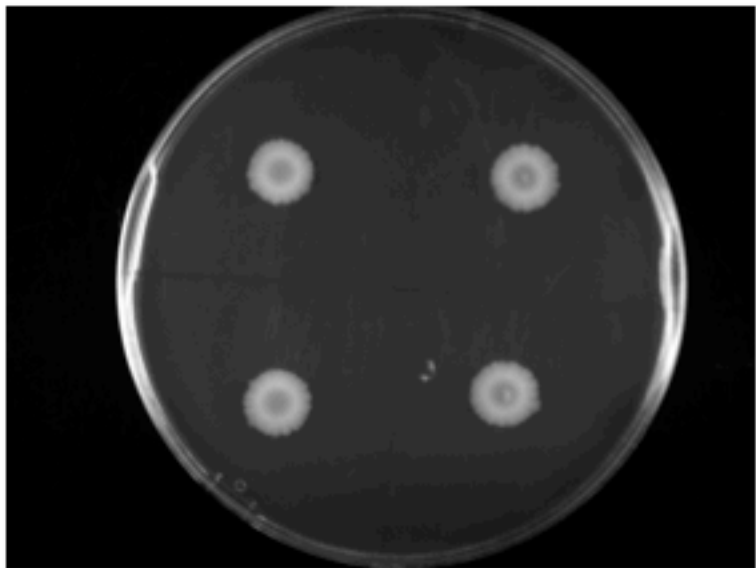**D.**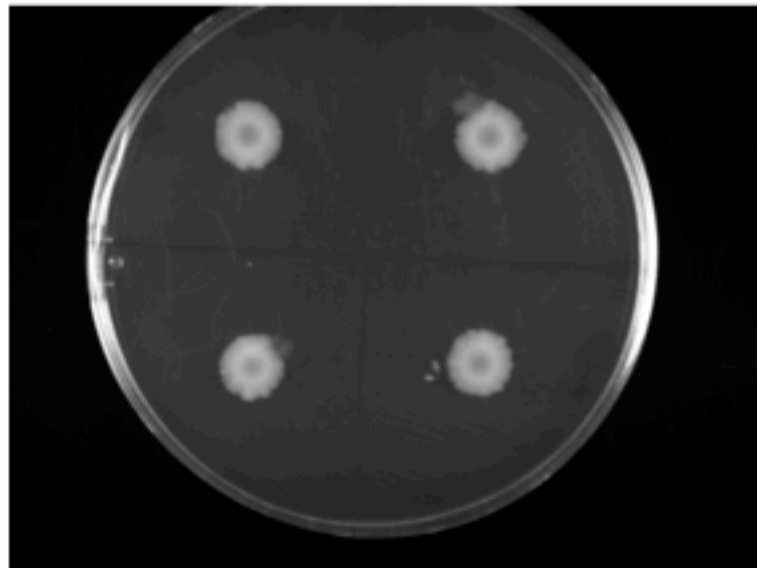

Supplement: JB.01614-14_zjb999093202so1.pdf [file JB.01614-14_zjb999093202so1.pdf]
